# Supplementary material
Source: PubMed Central journal article supplement (PMC8511356)
Supplement: NIHMS1708368-supplement-1.pdf [file NIHMS1708368-supplement-1.pdf]

**Supplemental Table 1.****Participant characteristics of past 30-day users of flavored JUUL and other e-cigarettes, by source: California, 2019 (unweighted n, %)**

|                                                                   | Retail          |                                 | Online          |                                 | Social          |                                 |
|-------------------------------------------------------------------|-----------------|---------------------------------|-----------------|---------------------------------|-----------------|---------------------------------|
|                                                                   | JUUL<br>(n=602) | Other<br>e-cigarette<br>(n=650) | JUUL<br>(n=602) | Other<br>e-cigarette<br>(n=650) | JUUL<br>(n=602) | Other<br>e-cigarette<br>(n=650) |
| <b>Age group</b>                                                  |                 |                                 |                 |                                 |                 |                                 |
| 15-20 years                                                       | 100 (34.1)      | 89 (32.7)                       | 32 (10.9)       | 35 (12.9)                       | 221 (75.4)      | 192 (70.6)                      |
| 21-29 years                                                       | 142 (45.9)      | 229 (60.6)                      | 56 (18.1)       | 70 (18.5)                       | 172 (55.7)      | 166 (43.9)                      |
| <b>Gender</b>                                                     |                 |                                 |                 |                                 |                 |                                 |
| Male                                                              | 98 (42.6)       | 114 (51.1)                      | 32 (13.9)       | 42 (18.8)                       | 147 (63.9)      | 114 (51.1)                      |
| Female                                                            | 132 (38.8)      | 181 (46.8)                      | 52 (15.3)       | 58 (15.0)                       | 223 (65.6)      | 226 (58.4)                      |
| Other                                                             | 11 (36.7)       | 21 (56.8)                       | 4 (13.3)        | 5 (13.5)                        | 22 (73.3)       | 17 (45.9)                       |
| <b>LGBTQ</b>                                                      |                 |                                 |                 |                                 |                 |                                 |
| Yes                                                               | 57 (36.1)       | 98 (48.0)                       | 18 (11.4)       | 33 (16.2)                       | 115 (72.8)      | 117 (57.3)                      |
| No                                                                | 179 (41.6)      | 210 (48.8)                      | 67 (15.6)       | 72 (16.7)                       | 271 (63.0)      | 231 (53.7)                      |
| <b>Race/ethnicity</b>                                             |                 |                                 |                 |                                 |                 |                                 |
| Hispanic, non-Black                                               | 71 (44.1)       | 109 (53.4)                      | 23 (14.3)       | 26 (12.7)                       | 105 (65.2)      | 107 (52.4)                      |
| Other (including Asian, other/multi-race and Black)               | 90 (38.0)       | 92 (42.0)                       | 41 (17.3)       | 44 (20.1)                       | 157 (66.2)      | 125 (57.1)                      |
| White, non-Hispanic                                               | 73 (39.5)       | 108 (50.7)                      | 19 (10.3)       | 34 (15.9)                       | 121 (65.4)      | 119 (55.9)                      |
| <b>Household finances</b>                                         |                 |                                 |                 |                                 |                 |                                 |
| Just meet or have difficulty meeting basic expenses <sup>^</sup>  | 60 (40.8)       | 88 (52.4)                       | 20 (13.6)       | 20 (11.9)                       | 102 (69.4)      | 95 (56.5)                       |
| Meet needs with a little left over                                | 75 (38.1)       | 97 (43.9)                       | 32 (16.2)       | 32 (14.5)                       | 124 (62.9)      | 129 (58.4)                      |
| Live comfortably                                                  | 107 (41.5)      | 133 (50.9)                      | 36 (13.9)       | 53 (20.3)                       | 167 (64.7)      | 134 (51.3)                      |
| <b>Lives in locality that restricts sales of flavored tobacco</b> |                 |                                 |                 |                                 |                 |                                 |
| Yes                                                               | 116 (33.6)      | 93 (34.6)                       | 45 (13.0)       | 44 (16.4)                       | 239 (69.3)      | 180 (66.9)                      |
| No                                                                | 126 (49.0)      | 225 (59.1)                      | 43 (16.7)       | 61 (16.0)                       | 154 (59.9)      | 178 (46.7)                      |

Cell entries are frequency and row percents (unweighted, e.g., 34.1% of users ages 15-20 obtained JUUL from a retail source), and participants could report multiple sources. <sup>^</sup>Too few Black respondents obtained other e-cigarettes online (count:8) and therefore combined with other groups, including Asian/Pacific Islander, non-Hispanic and Other/ multi-race, non-Hispanic.

**Supplemental Table 2. Participant characteristics of past 30-day users of flavored JUUL and other e-cigarettes, by source: California, 2019 (weighted % (95% CI))**

|                                                             | Retail       |                   | Online       |                   | Social       |                   |
|-------------------------------------------------------------|--------------|-------------------|--------------|-------------------|--------------|-------------------|
|                                                             | JUUL         | Other e-cigarette | JUUL         | Other e-cigarette | JUUL         | Other e-cigarette |
| <b>Age group</b>                                            |              |                   |              |                   |              |                   |
| 15-20 years                                                 | 33.6         | 31.2              | 11.6         | 12.7              | 76.0         | 70.9              |
| 95% CI                                                      | (27.9, 39.7) | (25.5, 37.5)      | (8.1, 16.4)  | (8.9, 17.7)       | (70.3, 80.9) | (64.6, 76.5)      |
| 21-29 years                                                 | 44.3         | 59.4              | 19.6         | 19.1              | 57.2         | 47.3              |
| 95% CI                                                      | (38.1, 50.7) | (53.7, 64.9)      | (14.8, 25.4) | (14.9, 24.1)      | (50.8, 63.3) | (41.6, 53.1)      |
| <b>Sex</b>                                                  |              |                   |              |                   |              |                   |
| Male                                                        | 41.7         | 49.6              | 13.7         | 19.3              | 63.9         | 53.1              |
| 95% CI                                                      | (34.8, 48.9) | (42.3, 56.9)      | (9.5, 19.3)  | (14.2, 25.8)      | (56.7, 70.5) | (45.8, 60.3)      |
| Female                                                      | 38.3         | 44.8              | 17.4         | 15.2              | 66.7         | 61.4              |
| 95% CI                                                      | (32.7, 44.3) | (39.3, 50.4)      | (13.0, 22.9) | (11.5, 19.8)      | (60.8, 72.1) | (55.9, 66.6)      |
| Other                                                       | 28.4         | 53.8              | 12.2         | 10.5              | 80.4         | 48.2              |
| 95% CI                                                      | (14.9, 47.1) | (36.7, 70.1)      | (4.4, 29.7)  | (4.3, 23.4)       | (63.2, 90.7) | (31.7, 65.1)      |
| <b>LGBTQ</b>                                                |              |                   |              |                   |              |                   |
| Yes                                                         | 31.9         | 46.5              | 12.2         | 16.7              | 74.3         | 59.2              |
| 95% CI                                                      | (24.7, 40.1) | (38.9, 54.1)      | (7.5, 19.4)  | (11.5, 23.7)      | (66.2, 81.0) | (51.6, 66.4)      |
| No                                                          | 41.7         | 47.0              | 16.7         | 16.8              | 64.2         | 56.7              |
| 95% CI                                                      | (36.5, 47.0) | (41.8, 52.3)      | (12.9, 21.4) | (13.2, 21.2)      | (58.9, 69.1) | (51.4, 61.9)      |
| <b>Race/ethnicity</b>                                       |              |                   |              |                   |              |                   |
| Hispanic, non-Black                                         | 43.0         | 51.1              | 13.2         | 13.3              | 67.6         | 55.4              |
| 95% CI                                                      | (35.1, 51.3) | (43.7, 58.5)      | (8.7, 19.4)  | (8.8, 19.5)       | (59.8, 74.6) | (48.0, 62.6)      |
| Other (including Asian, other/multi-race and Black) 95% CI  | 37.9         | 42.0              | 19.3         | 18.5              | 67.2         | 58.2              |
|                                                             | (31.3, 45.0) | (34.9, 49.5)      | (14.0, 25.9) | (13.6, 24.6)      | (60.3, 73.5) | (50.7, 65.2)      |
| White, non-Hispanic                                         | 36.8         | 47.6              | 12.3         | 17.5              | 65.4         | 59.7              |
| 95% CI                                                      | (29.2, 45.2) | (39.8, 55.4)      | (7.4, 19.8)  | (12.1, 24.6)      | (56.8, 73.0) | (51.9, 67.0)      |
| <b>Household finances</b>                                   |              |                   |              |                   |              |                   |
| Just meet or have difficulty meeting basic expenses^ 95% CI | 38.8         | 48.3              | 13.5         | 10.8              | 73.2         | 60.9              |
|                                                             | (30.5, 47.7) | (39.8, 57.0)      | (8.4, 20.9)  | (6.2, 18.1)       | (65.0, 80.0) | (52.5, 68.9)      |
| Meet needs with a little left over                          | 35.6         | 43.6              | 17.1         | 15.9              | 63.6         | 59.1              |
| 95% CI                                                      | (28.4, 43.3) | (36.5, 50.9)      | (11.8, 24.2) | (11.2, 22.2)      | (55.5, 70.9) | (51.7, 66.0)      |
| Live comfortably                                            | 42.2         | 49.4              | 15.9         | 20.5              | 64.3         | 53.8              |
| 95% CI                                                      | (35.7, 49.1) | (42.7, 56.2)      | (11.2, 22.1) | (15.6, 26.5)      | (57.6, 70.6) | (47.1, 60.5)      |
| Lives in locality that restricts sales of flavored tobacco  |              |                   |              |                   |              |                   |

|               |                      |                      |                      |                      |                      |                      |
|---------------|----------------------|----------------------|----------------------|----------------------|----------------------|----------------------|
| Yes<br>95% CI | 32.9<br>(27.5, 38.8) | 36.8<br>(30.3, 43.8) | 14.5<br>(10.5, 19.7) | 16.0<br>(11.6, 21.7) | 69.6<br>(63.7, 74.9) | 66.7<br>(59.8, 72.8) |
| No<br>95% CI  | 46.9<br>(40.3, 53.5) | 54.8<br>(49.2, 60.3) | 17.3<br>(12.7, 23.1) | 16.6<br>(12.7, 21.2) | 62.2<br>(55.6, 68.4) | 50.8<br>(45.3, 56.3) |

Cell entries are frequency and row percents (weighted, e.g., 33.6% of users ages 15-20 obtained JUUL from a retail source), and participants could report multiple sources. ^Too few Black respondents obtained other e-cigarettes online (count:8) and therefore combined with other groups, including Asian/Pacific Islander, non-Hispanic and Other/ multi-race, non-Hispanic.
